# Supplementary material for: Molecular Subtyping and Survival Analysis of Osteosarcoma Reveals Prognostic Biomarkers and Key Canonical Pathways
Source: MDPI journal article supplement (doi:10.3390/cancers15072134), 2023-04-04
Supplement: s1 [file s1]

## *Supplementary materials*

*Article*

# **Molecular Subtyping and Survival Analysis of Osteosarcoma Reveals Prognostic Biomarkers and Key Canonical Pathways**

**Siddesh Southeikal <sup>1,†</sup>, Sushil Kumar Shakyawar <sup>1,†</sup>, Prachi Bajpai <sup>2</sup>, Amr Elkholy <sup>2</sup>, Upender Manne <sup>2</sup>, Nitish Kumar Mishra <sup>1,\*</sup> and Chittibabu Guda <sup>1,3,\*</sup>**

<sup>1</sup> Department of Genetics, Cell Biology and Anatomy, University of Nebraska Medical Center, Omaha, NE 68198, USA

<sup>2</sup> Department of Pathology, University of Alabama at Birmingham, Birmingham, AL 35233, USA

<sup>3</sup> Center for Biomedical Informatics Research and Innovation, University of Nebraska Medical Center, Omaha, NE 68198, USA

\* Correspondence: nitish.mishra@stjude.org (N.K.M.); babu.guda@unmc.edu (C.G.)

† These authors contributed equally to this work.

# Supplementary materials

## Supplementary Figures

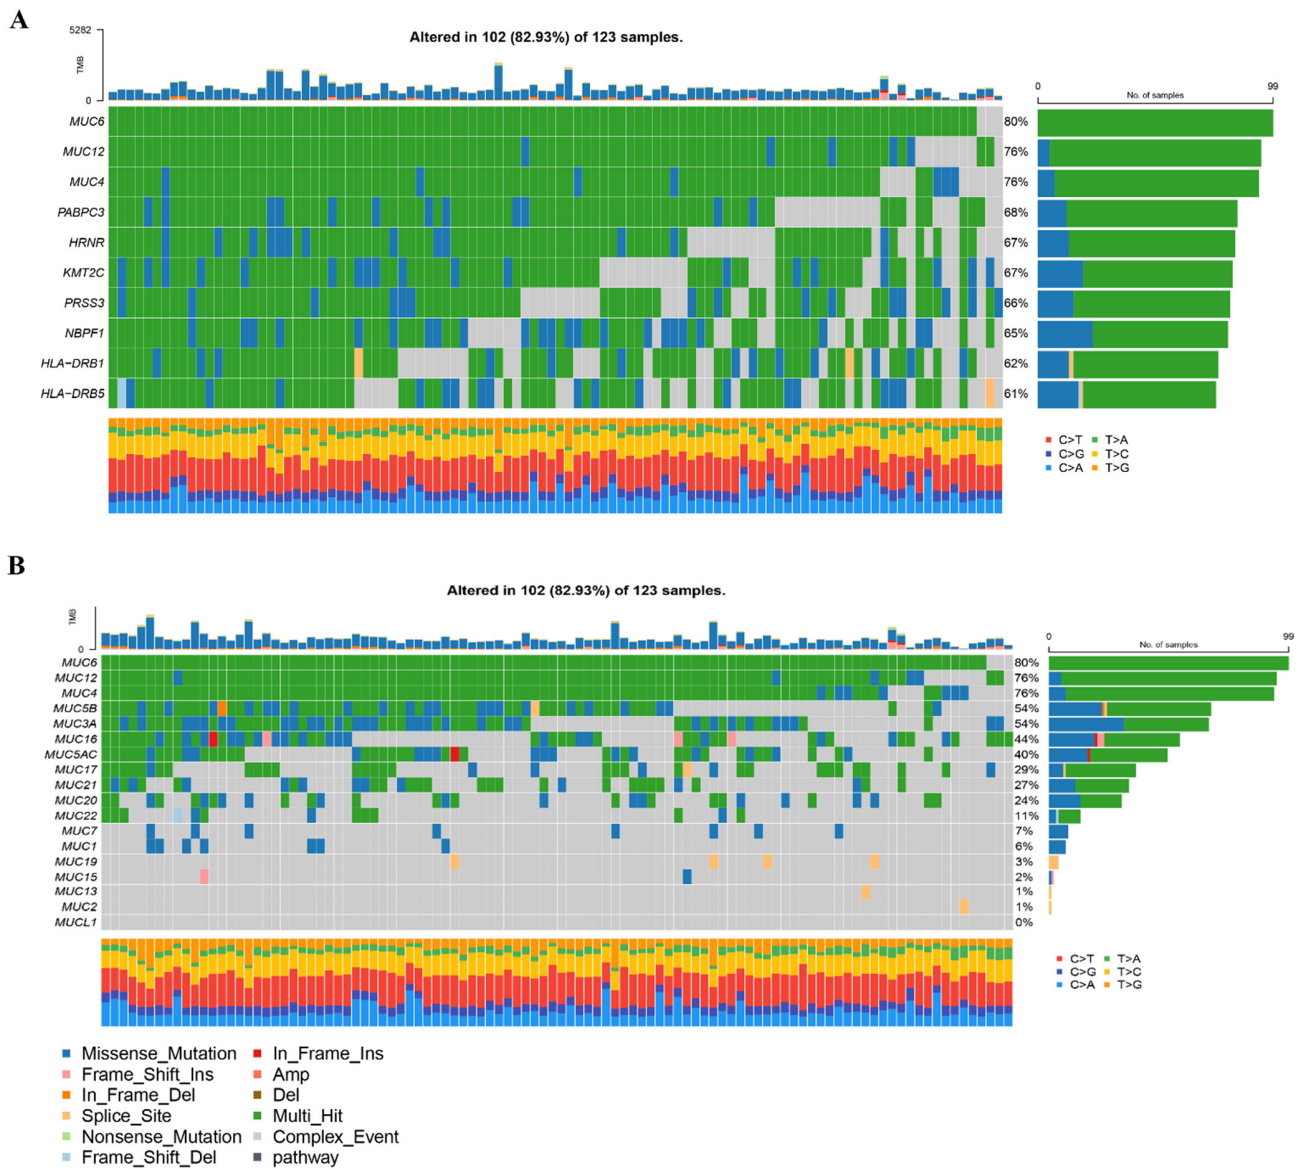

**Figure S1: (A)** Oncoplot of the top 15 most frequently mutated genes 123 OS patients. Colored squares show mutated genes, while grey squares show non mutated genes. Each color represents a different type of mutations. Each color represents different type of mutations as labelled in figure. **(B)** Oncoplot of the frequency of mutation in MUC family genes in 123 OS patients. Colored squares show mutated genes, while grey squares show non mutated genes. Each color represents a different type of mutations. Each color represents different type of mutations as labelled in figure.

## Supplementary materials

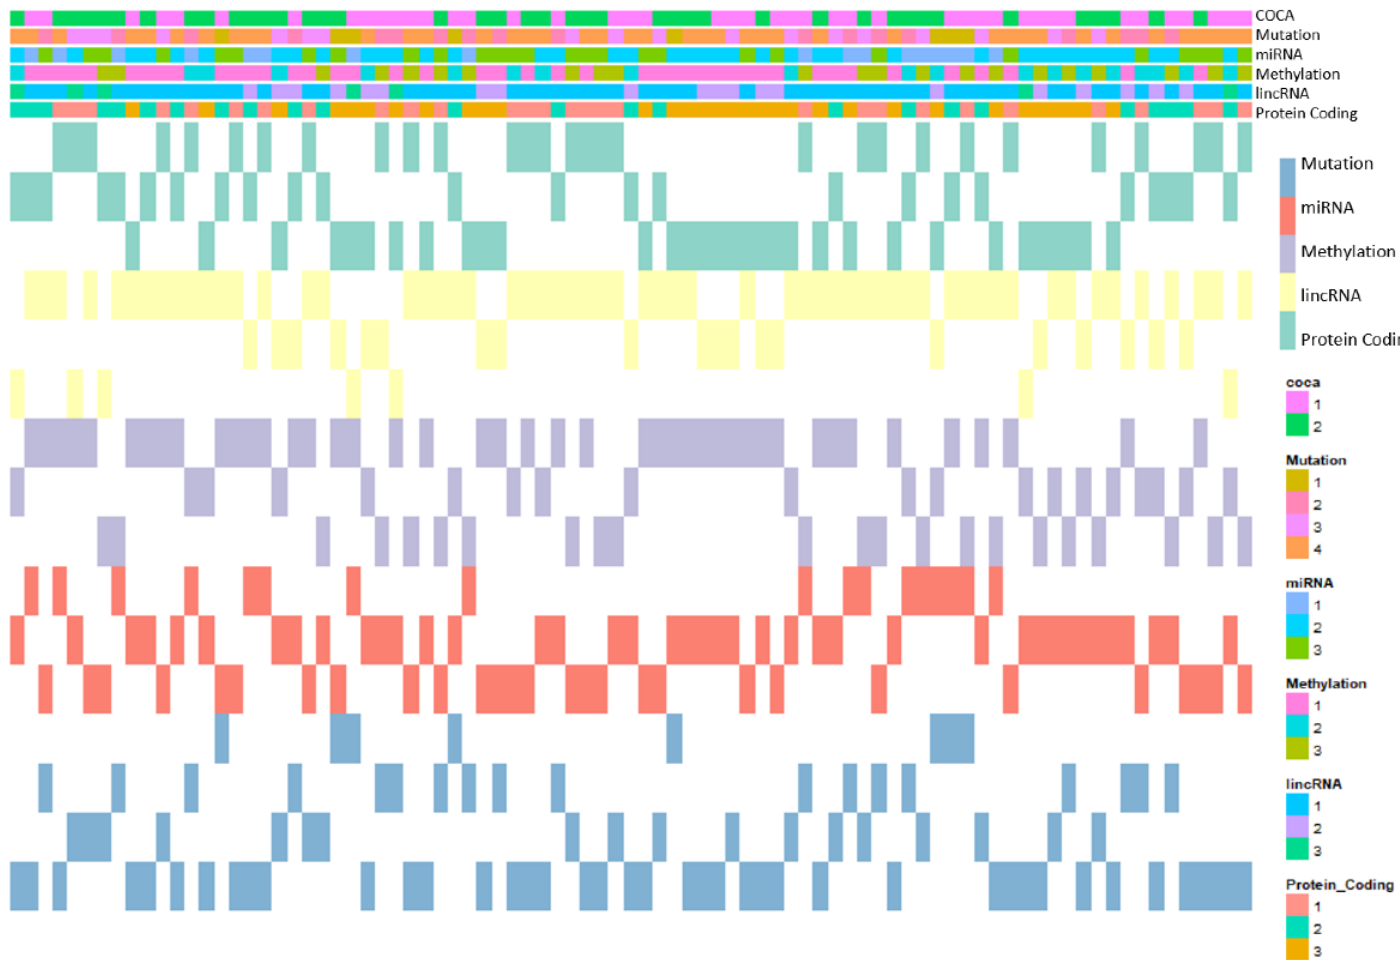

**Figure S2:** Clustering of 85 OS patients into two molecular subtypes based on multi-omics data using cluster-of-cluster analysis. The final multi-omics based molecular subtypes consisted of 44 and 41 samples respectively. The vertical sidebar shows the annotation of cluster labels obtained using individual of 'omics' data and the final multiomics-based clustering for each sample.

## Supplementary materials

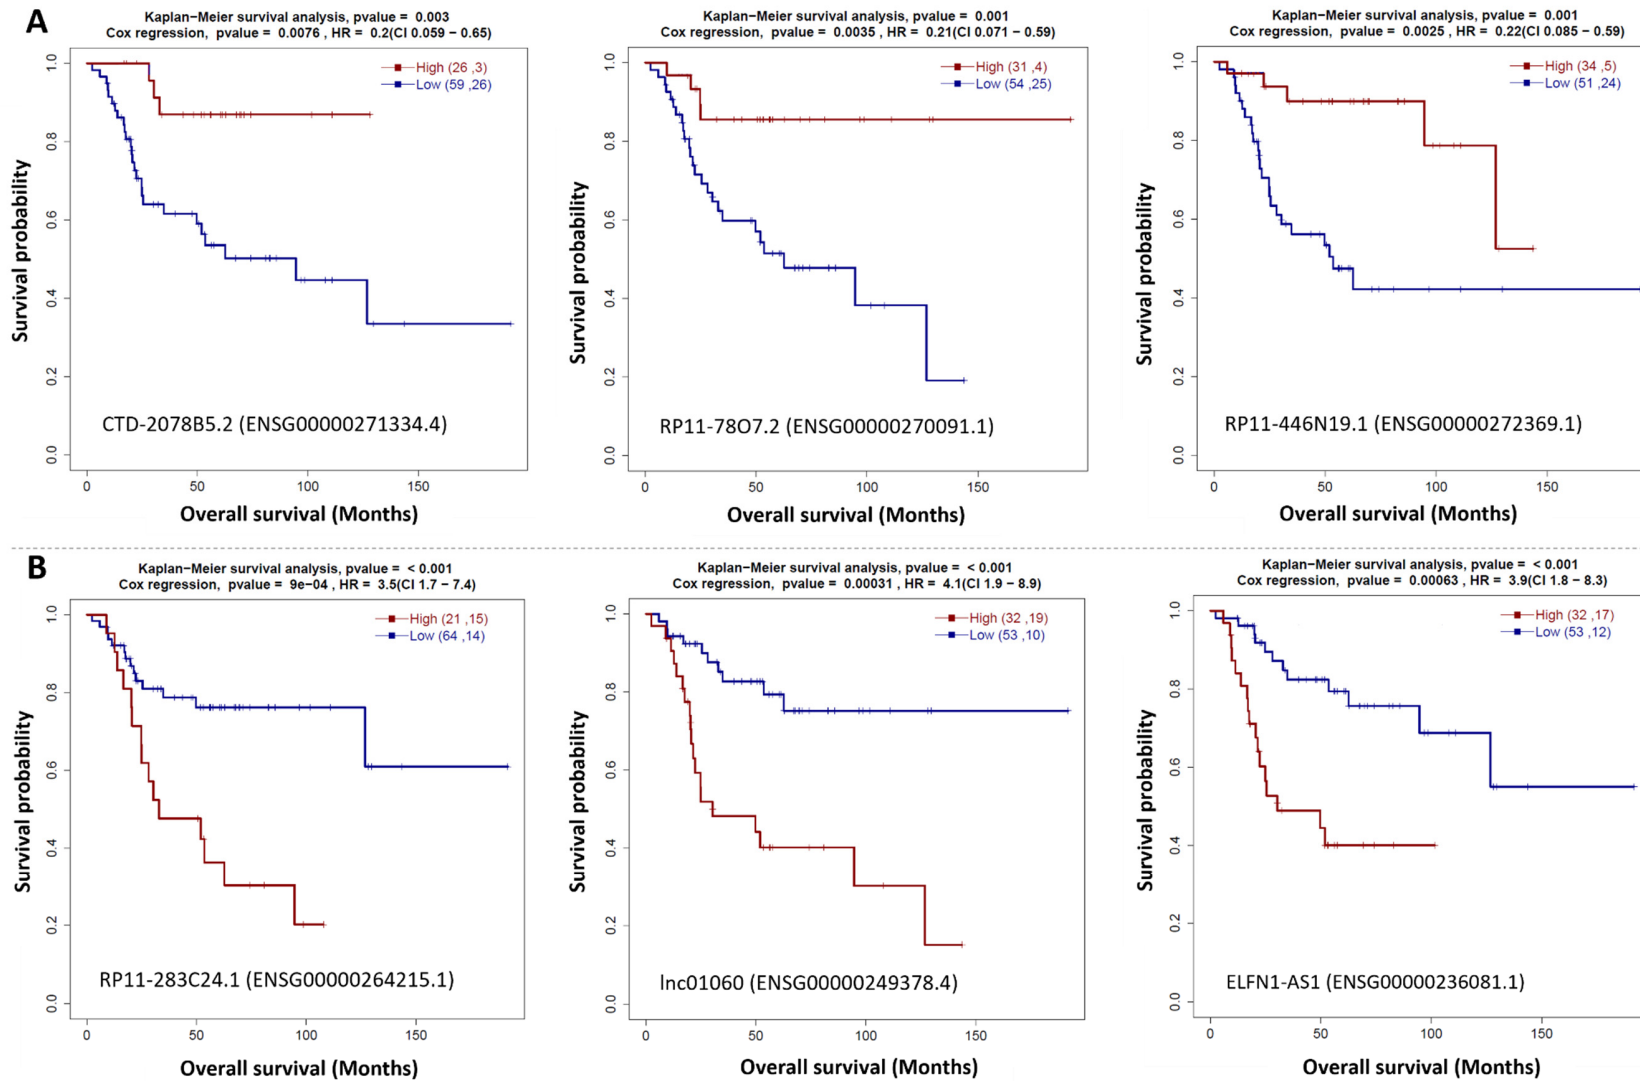

**Figure S3:** Kaplan-Meier plot for high versus low expression group in TARGET OS data with p-value from log-rank test and Cox regression model for lncRNAs *CTD-2078B5.2*, *RP11-78O7.2*, and *RP11-446N19.1* (HR < 1) (A), and *ELFN1-AS1*, *RP11-283C24.1* and *lnc01060* (HR > 1) (B)

## Supplementary materials

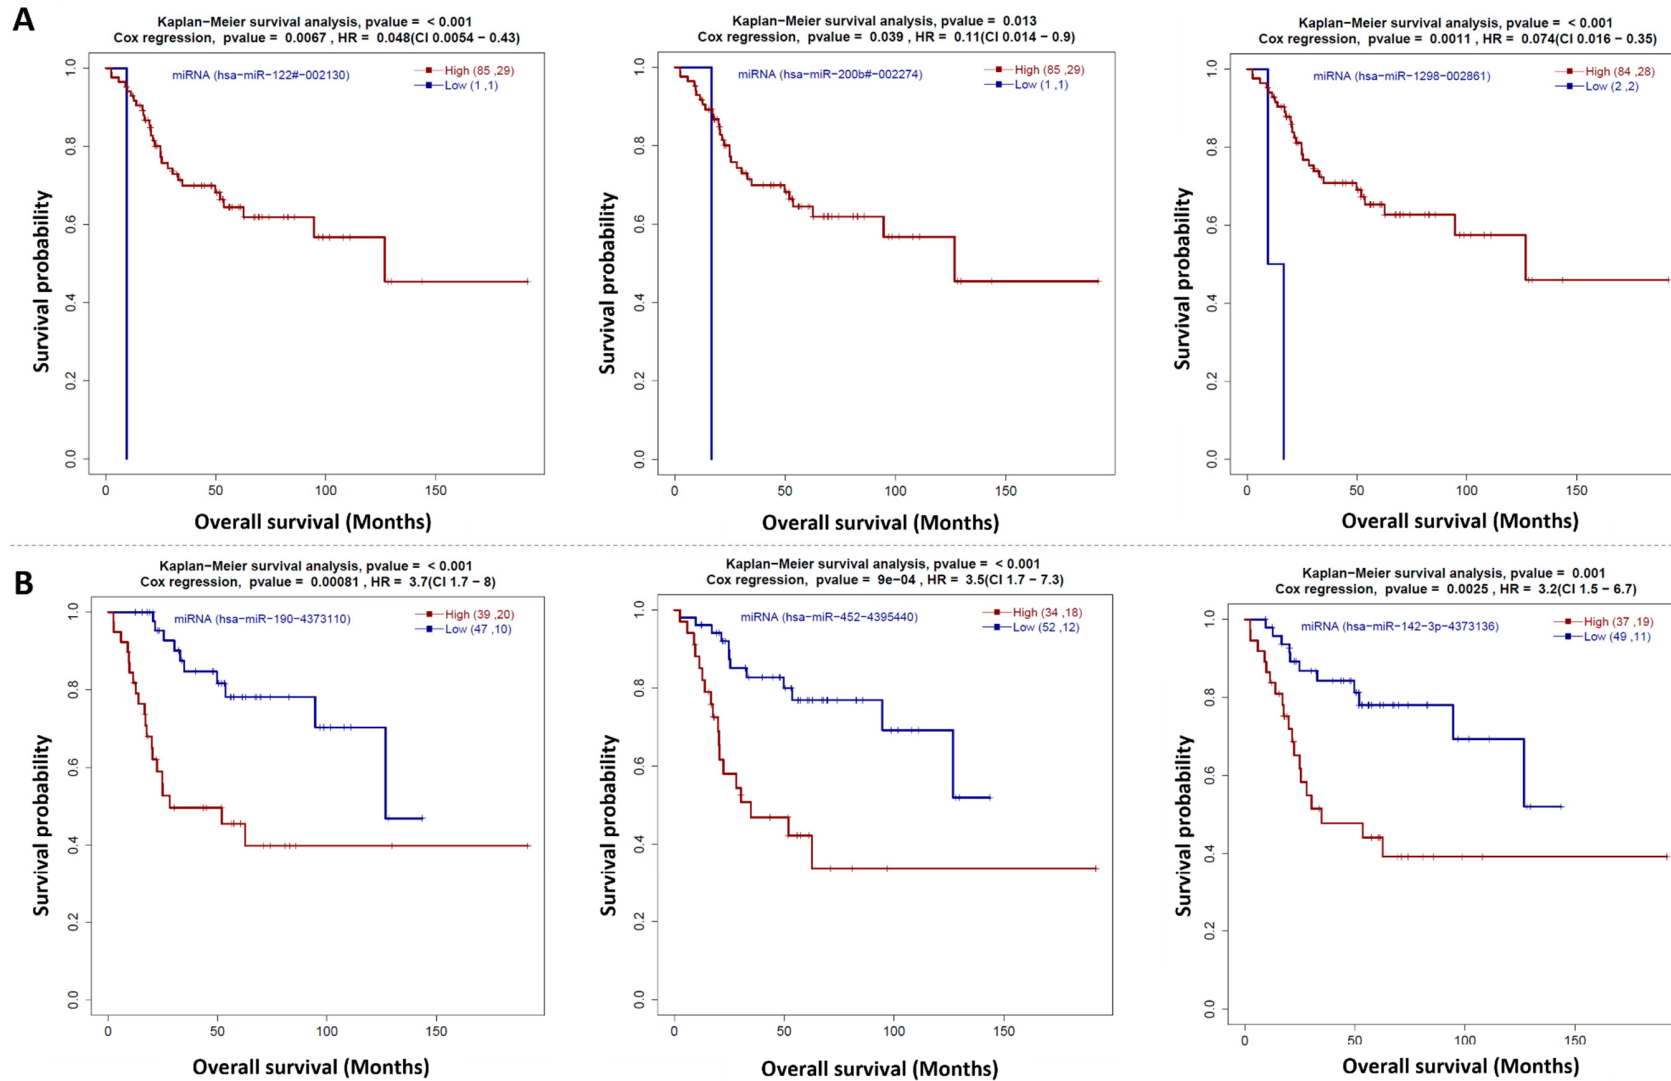

**Figure S4:** Kaplan-Meier plot for high vs low expression group in TARGET OS data with p-value from log-rank test and Cox regression model for miRNAs miR-122, miR-200b, miR-1298 (HR < 1) (A), and miR-190, miR-452, and miR-488 (HR > 1) (B)

## Supplementary materials

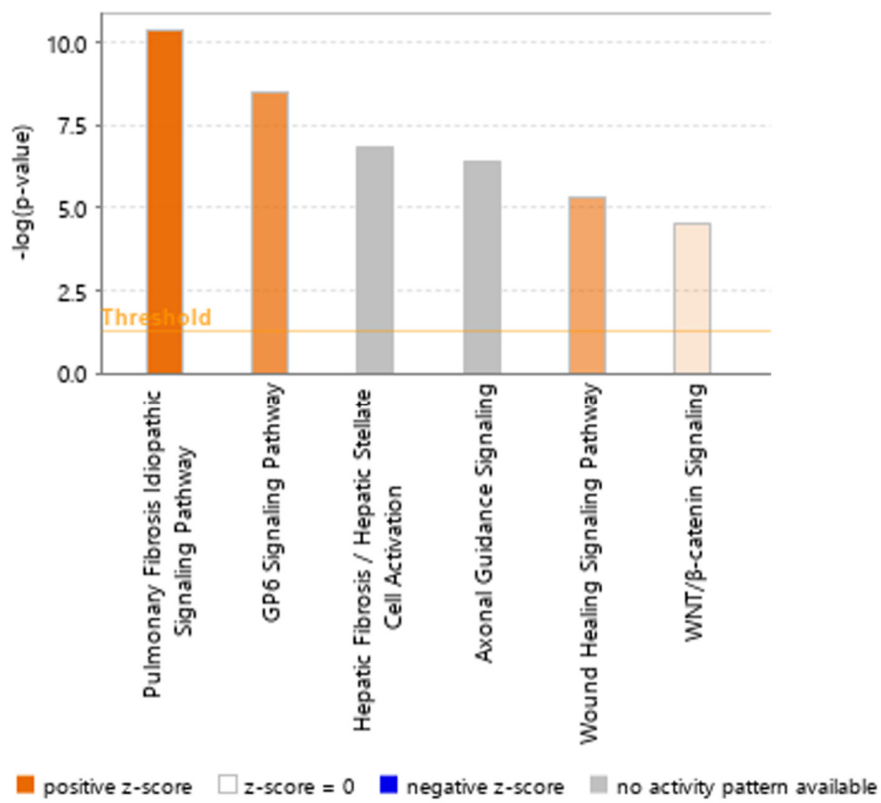

**Figure S5:** Top canonical pathway enriched between OS subtype 1 and subtype 2. (Analysis performed by IPA)
